# Supplementary material for: Photoantibacterial Poly(vinyl)chloride Films Applying Curcumin Derivatives as Bio-Based Plasticizers and Photosensitizers
Source: MDPI journal article supplement (doi:10.3390/molecules28052209), 2023-02-27
Supplement: s1 [file s1]

## Supporting Information

# Photoantibacterial poly(vinyl)chloride films applying curcumin derivatives as bio-based plasticizers and photosensitizers

Fábio M. S. Rodrigues<sup>1</sup>, Iúri Tavares<sup>1</sup>, Rafael T. Aroso<sup>1</sup>, Lucas D. Dias<sup>1,2</sup>, Carolina V. Domingos<sup>1</sup>, Clara M. G. de Faria<sup>2</sup>, Giusi Piccirillo<sup>1</sup>, Teresa M. R. Maria<sup>1</sup>, Rui M. B. Carrilho<sup>1</sup>, Vanderlei S. Bagnato<sup>2,3</sup>, Mário J. F. Calvete<sup>1,\*</sup> and Mariette M. Pereira<sup>1,\*</sup>

## Contents

### 1. Characterization spectra of curcumin derivatives 2-5

Figures S1 to S16

### 2. Photophysical characterization of curcumin derivatives 1-5

Figures S17 to S22

### 3. Preparation and characterization of PVC-curcumin materials

Figures S23 to S29

## 1. Characterization spectra of curcumin derivatives 2-5

Compound **2**:  $^1\text{H}$ -NMR,  $^{13}\text{C}$ -NMR, mass spectra and FTIR.

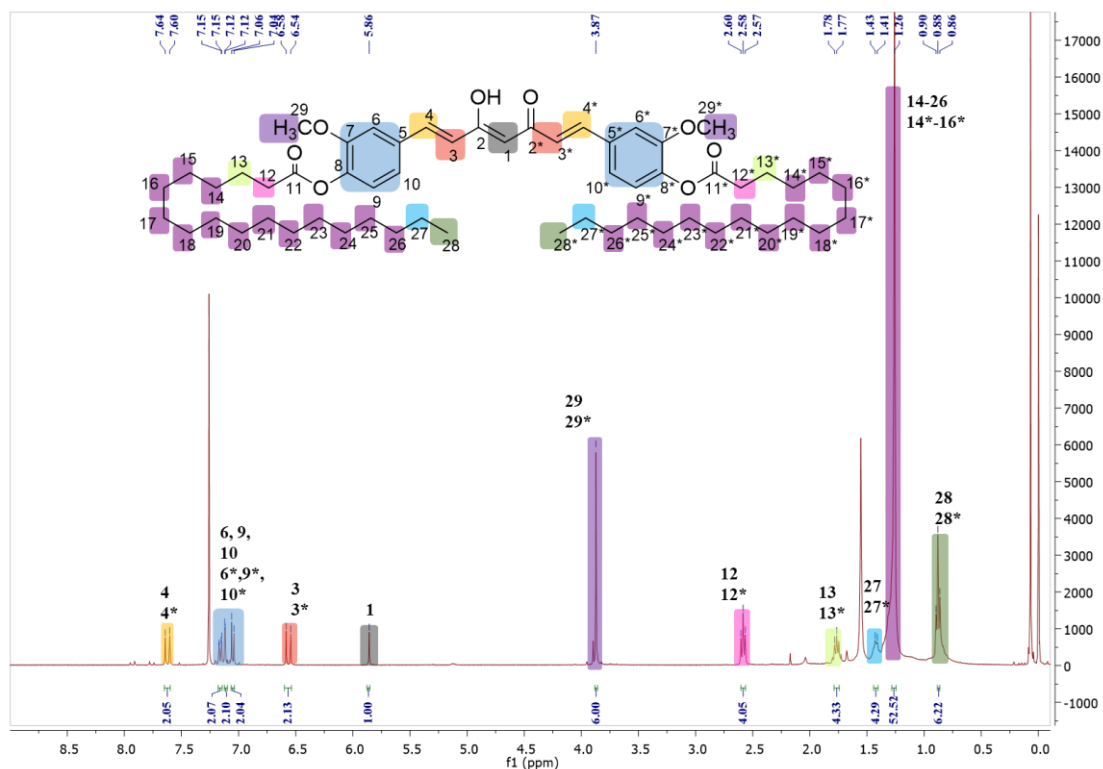

Figure S1.  $^1\text{H}$ -NMR of compound **2**, recorded in  $\text{CDCl}_3$ .

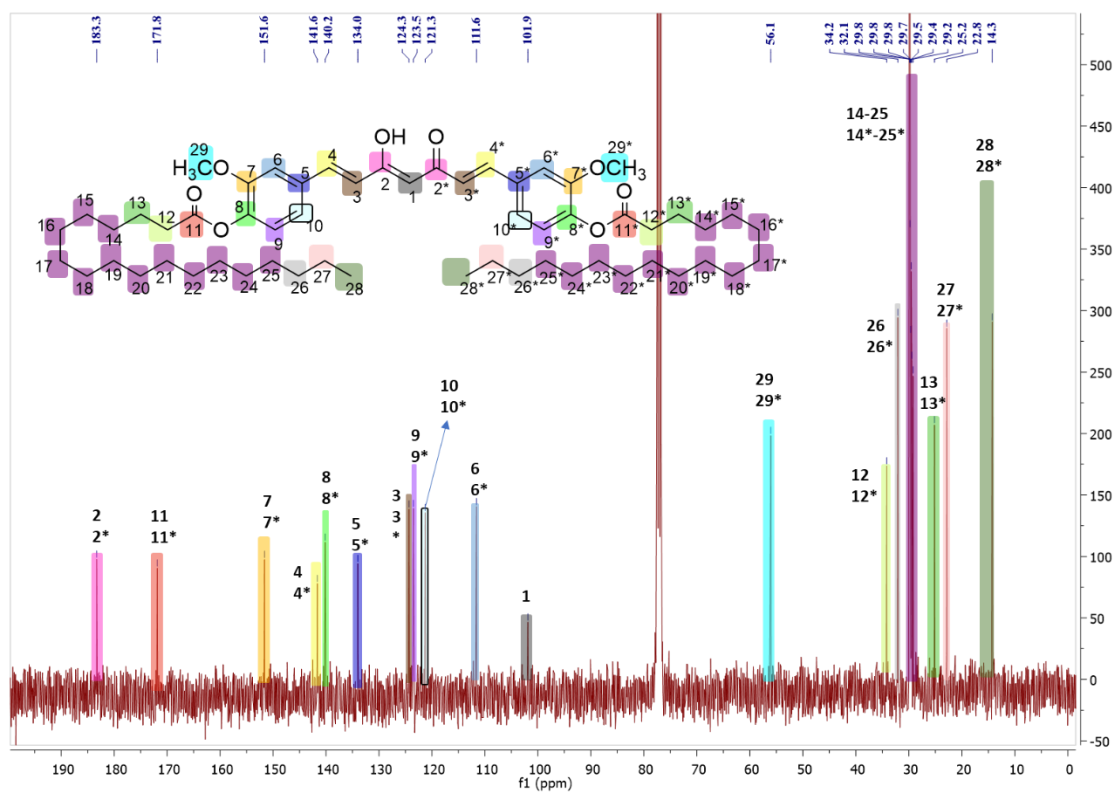

Figure S2.  $^{13}\text{C}$ -NMR of compound **2**, recorded in  $\text{CDCl}_3$ .

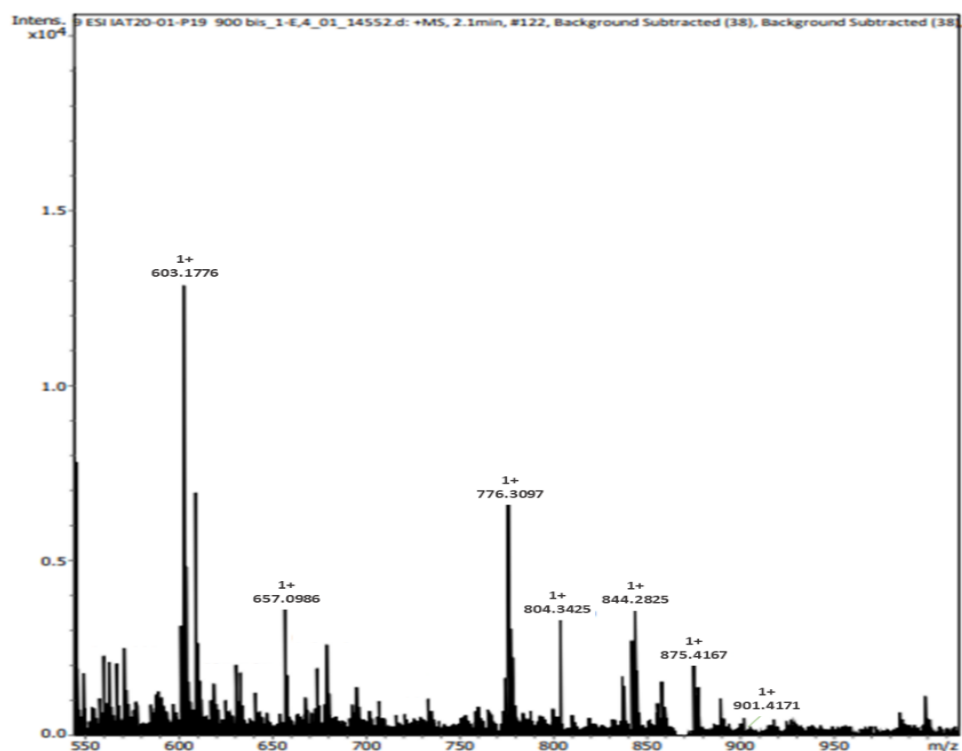

Figure S3. ESI-TOF mass spectrum of compound 2.

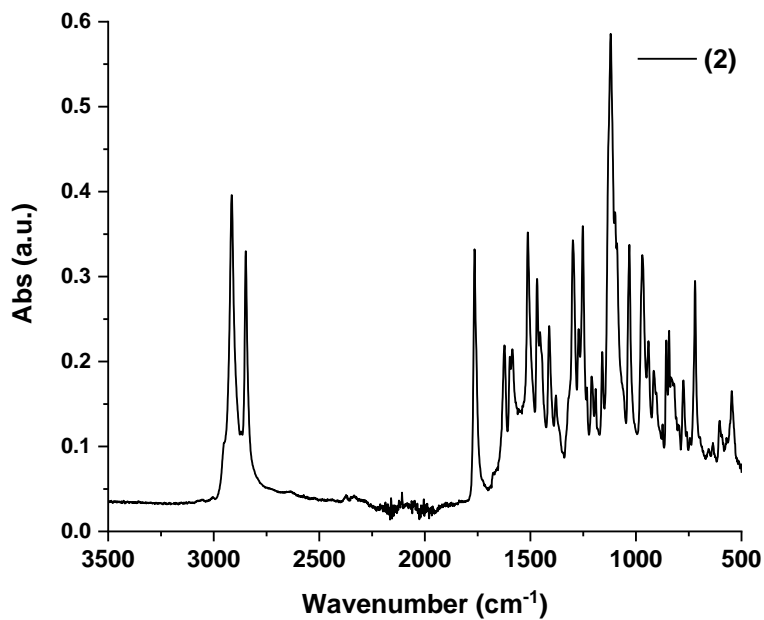

Figure S4. FTIR spectrum of compound 2: 2916  $\text{cm}^{-1}$  ( $\nu$  OH), 2849  $\text{cm}^{-1}$  ( $\nu$  CH), 1740  $\text{cm}^{-1}$  ( $\nu$  C=O) and 1119  $\text{cm}^{-1}$  ( $\nu$  C-OR).

Compound **3**:  $^1\text{H}$ -NMR,  $^{13}\text{C}$ -NMR, mass spectra and FTIR.

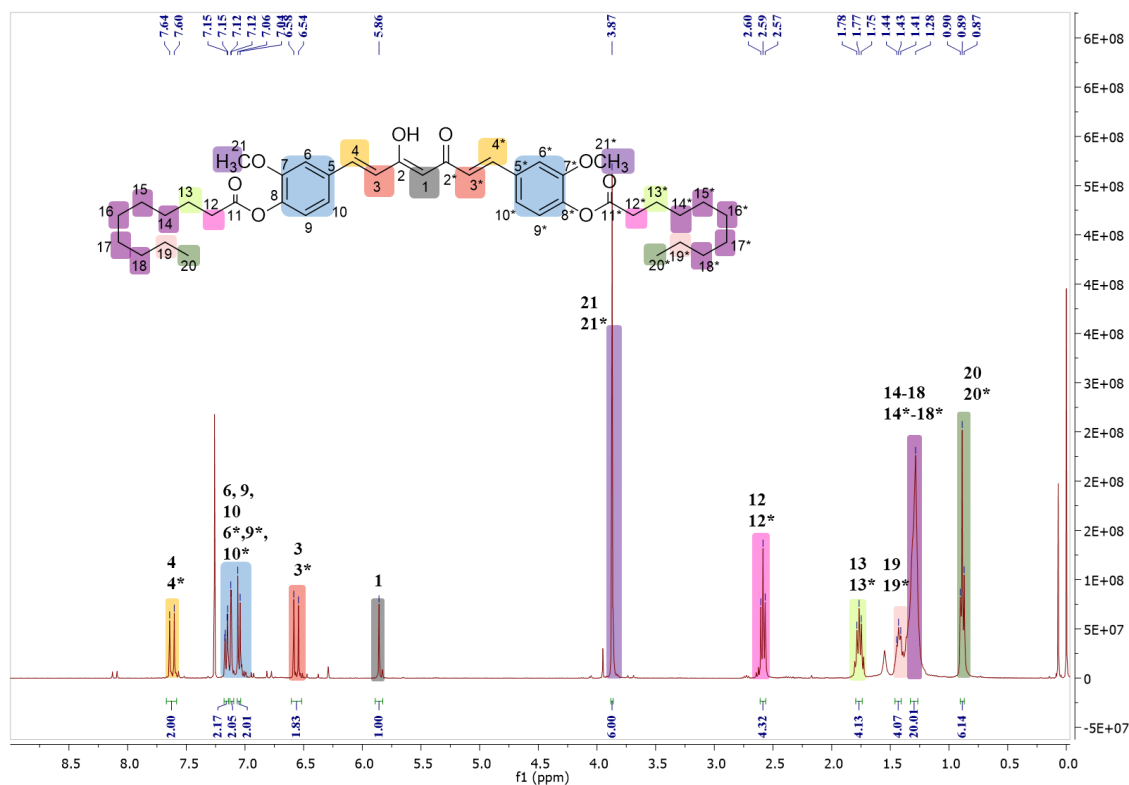

Figure S5.  $^1\text{H}$ -NMR of compound **3**, recorded in  $\text{CDCl}_3$ .

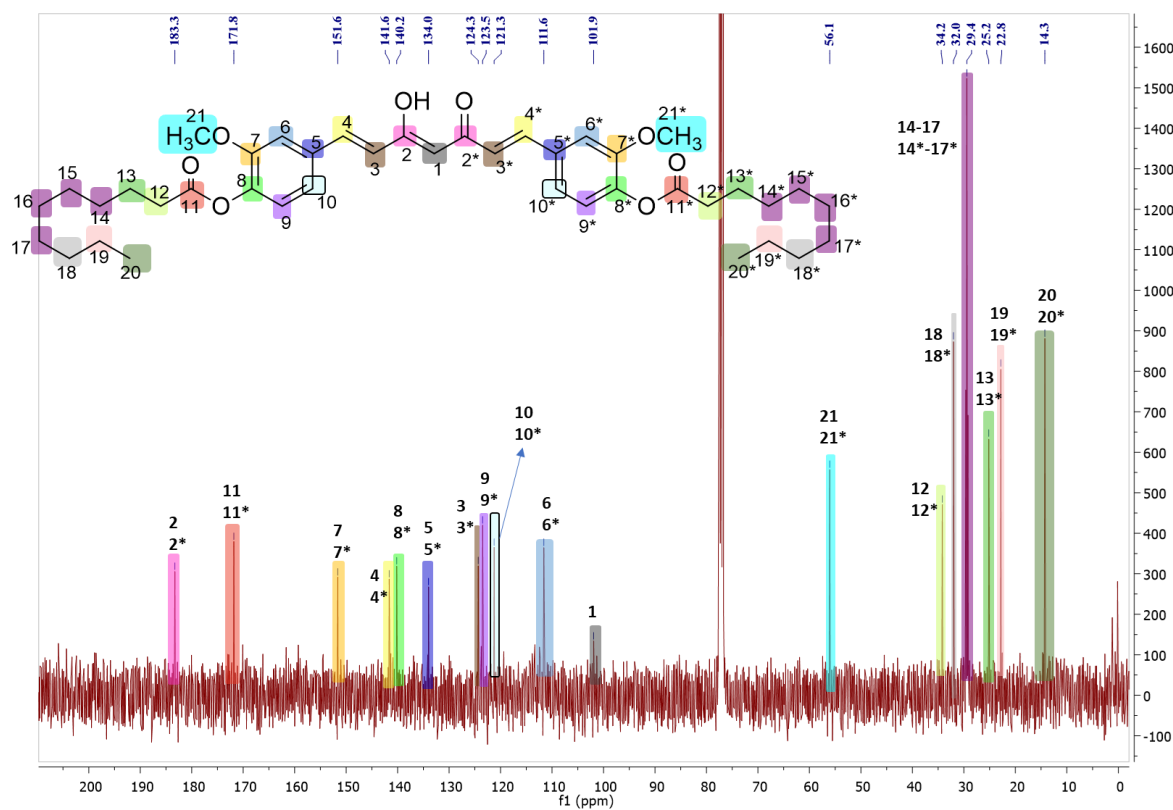

Figure S6.  $^{13}\text{C}$ -NMR of compound **3**, recorded in  $\text{CDCl}_3$ .

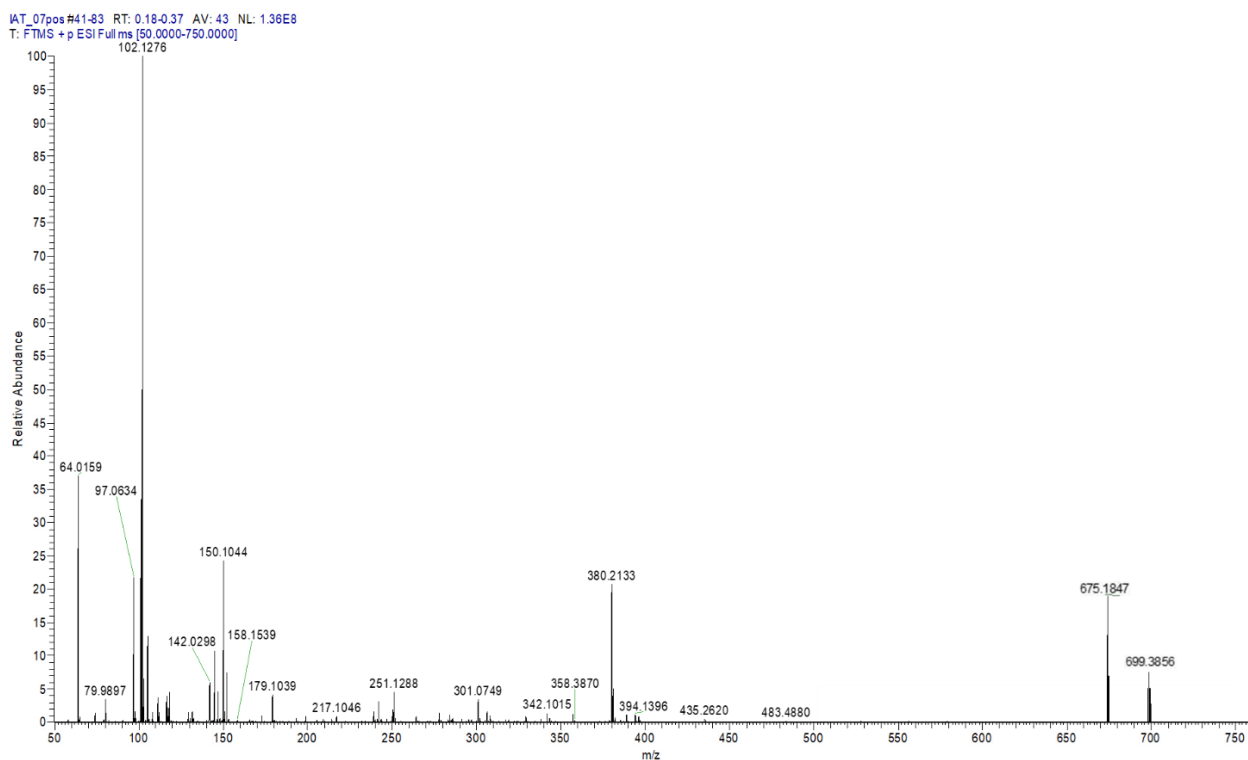

Figure S7. ESI-TOF mass spectrum of compound **3**.

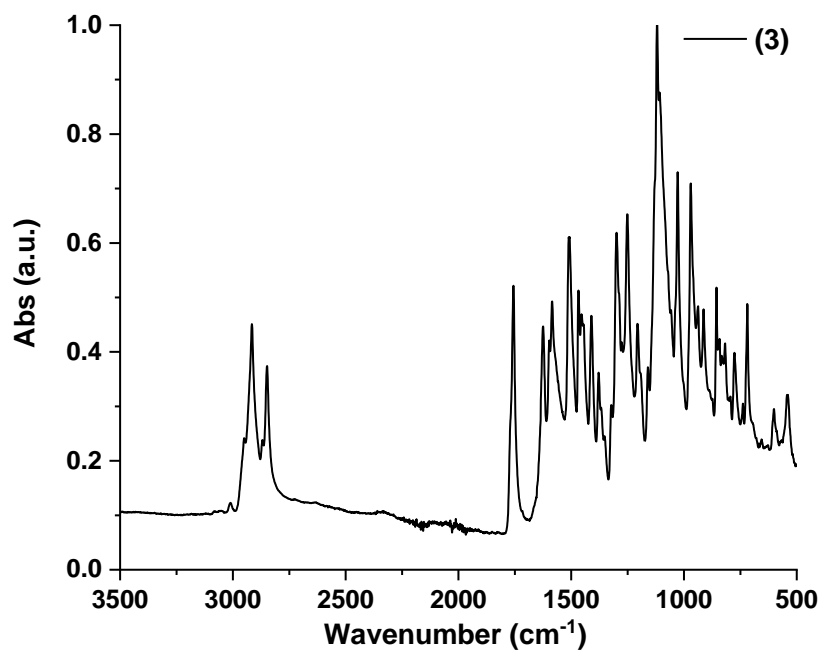

Figure S8. FTIR spectrum of compound **3**: 2911  $\text{cm}^{-1}$  ( $\nu$  OH), 2844  $\text{cm}^{-1}$  ( $\nu$  CH), 1766  $\text{cm}^{-1}$  ( $\nu$  C=O) and 1115  $\text{cm}^{-1}$  ( $\nu$  C-OR).

Compound **4**:  $^1\text{H}$ -NMR,  $^{13}\text{C}$ -NMR, mass spectra and FTIR.

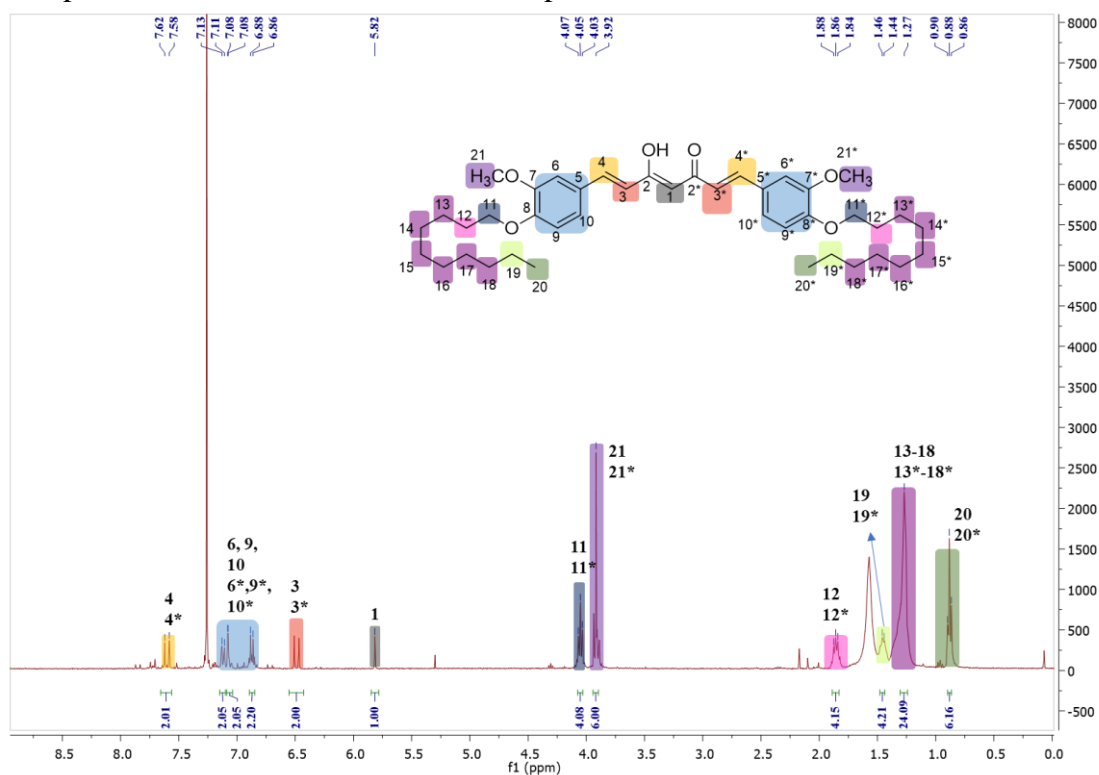

Figure S9.  $^1\text{H}$ -NMR of compound **4**, recorded in  $\text{CDCl}_3$ .

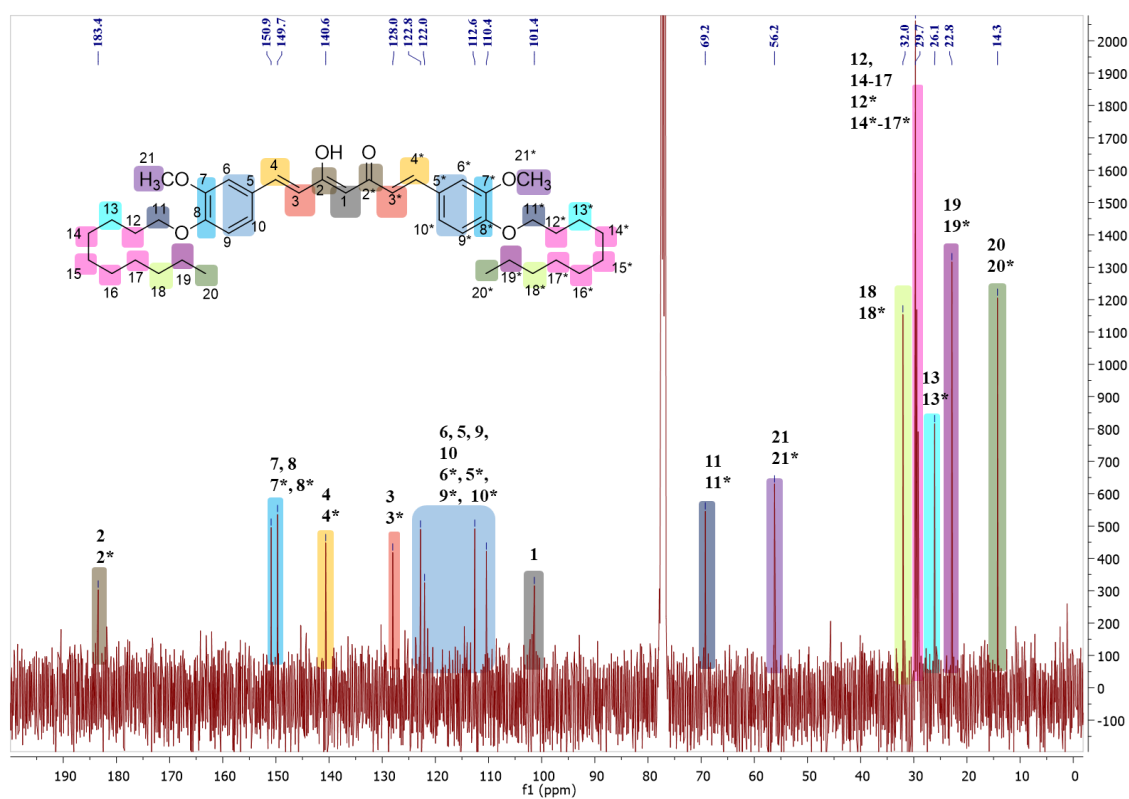

Figure S10.  $^{13}\text{C}$ -NMR of compound **4**, recorded in  $\text{CDCl}_3$ .

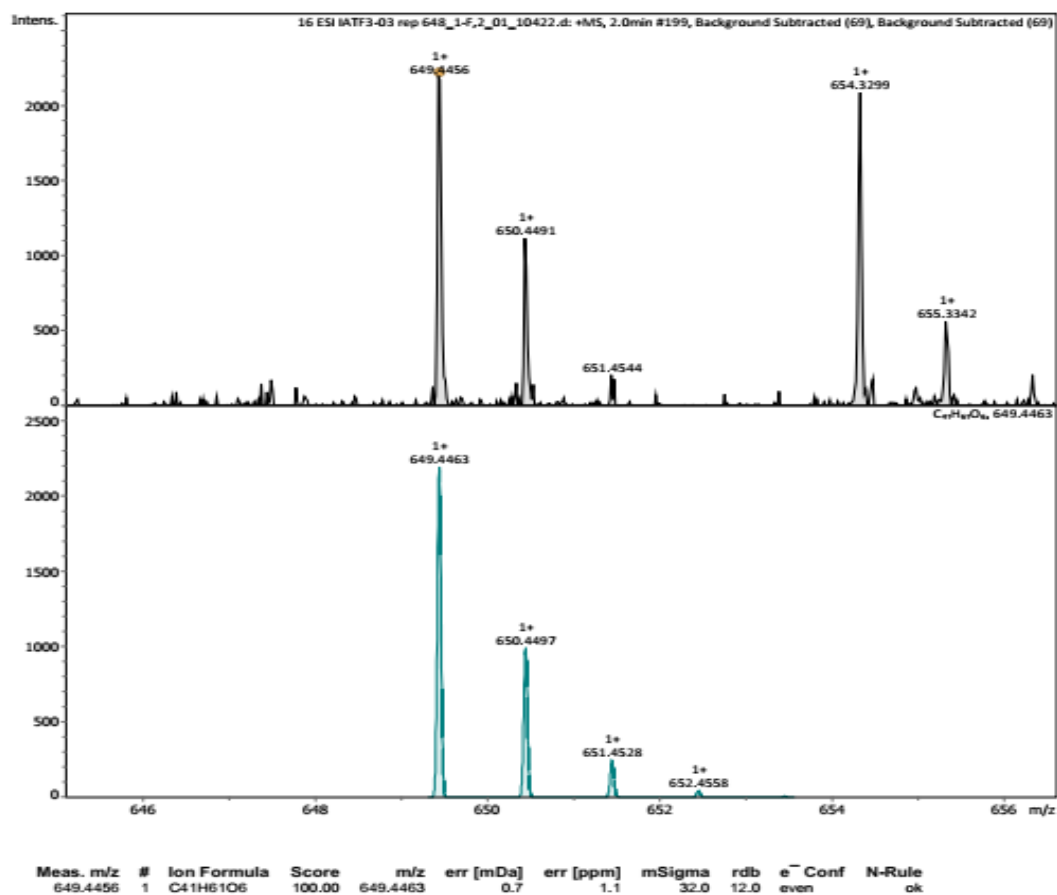

Figure S11. ESI-TOF mass spectrum of compound **4**.

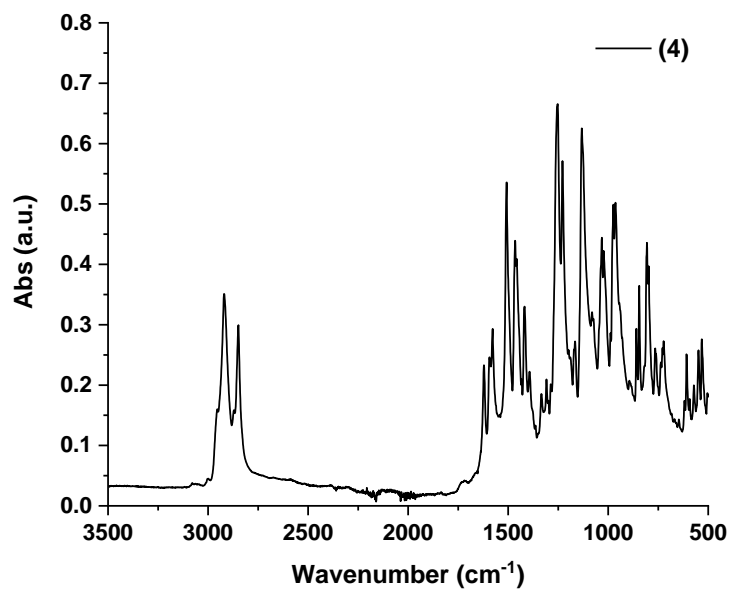

Figure S12. FTIR spectrum of compound **4**: 2921 cm<sup>-1</sup> (ν OH), 2845 cm<sup>-1</sup> (ν CH).

Compound **5**:  $^1\text{H}$ -NMR,  $^{13}\text{C}$ -NMR, mass spectra and FTIR.

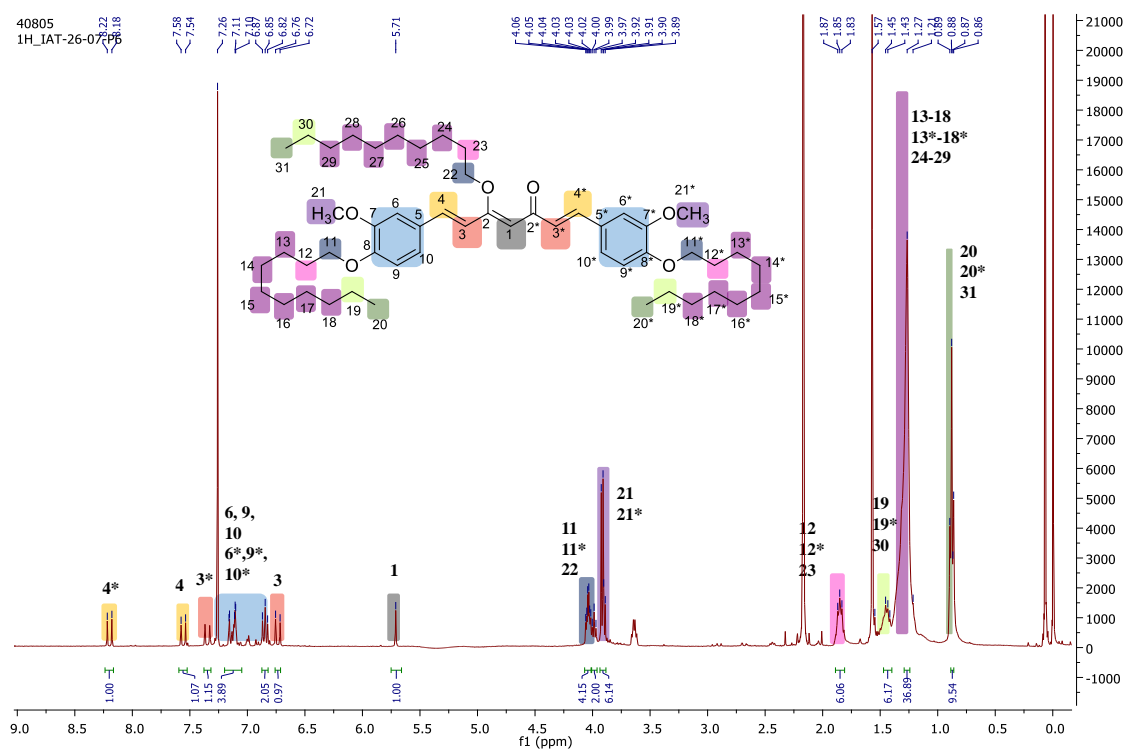

Figure S13.  $^1\text{H}$ -NMR of compound **5**, recorded in  $\text{CDCl}_3$ .

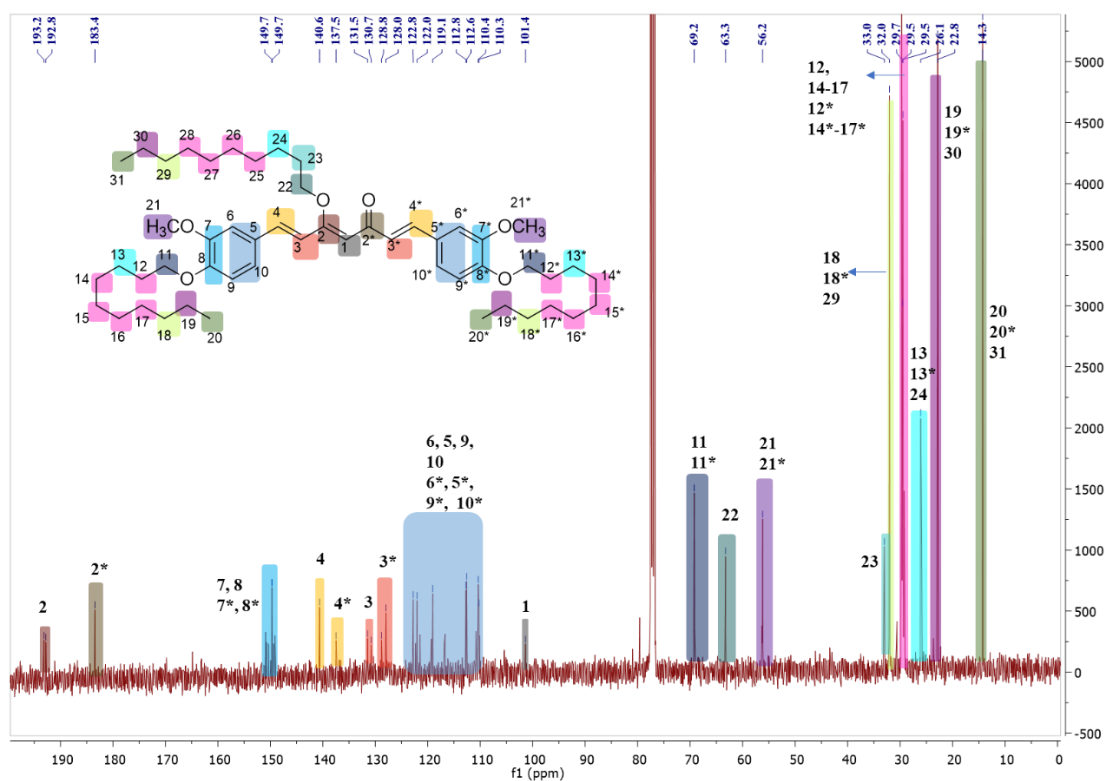

Figure S14.  $^{13}\text{C}$ -NMR of compound **5**, recorded in  $\text{CDCl}_3$ .



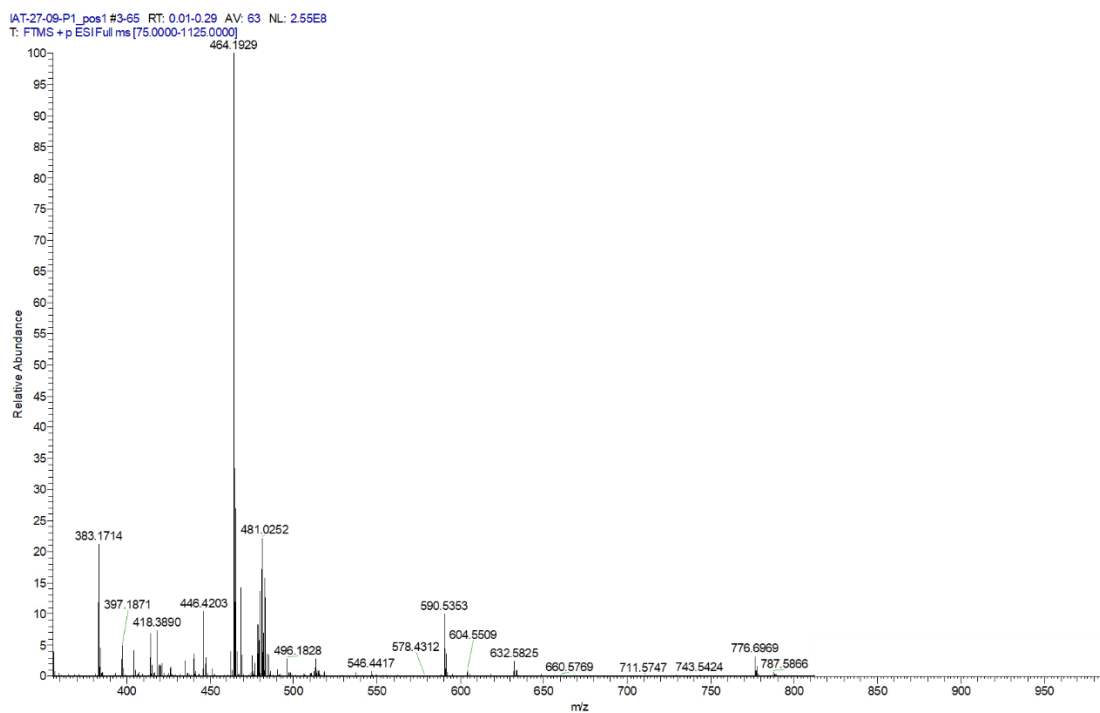

Figure S15. ESI-TOF mass spectrum of compound **5**.

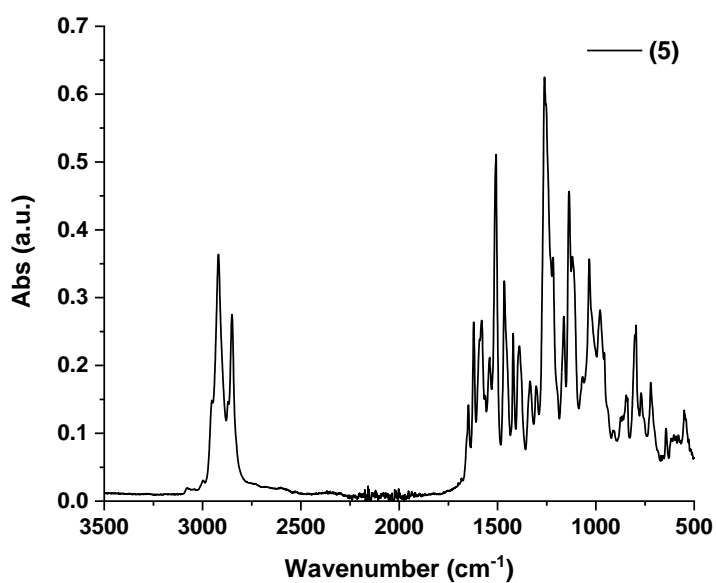

Figure S16. FTIR spectrum of compound **5**. 2926  $\text{cm}^{-1}$  ( $\nu$  OH), 2844  $\text{cm}^{-1}$  ( $\nu$  CH).

## 2. Photophysical characterization of curcumin derivatives 1-5

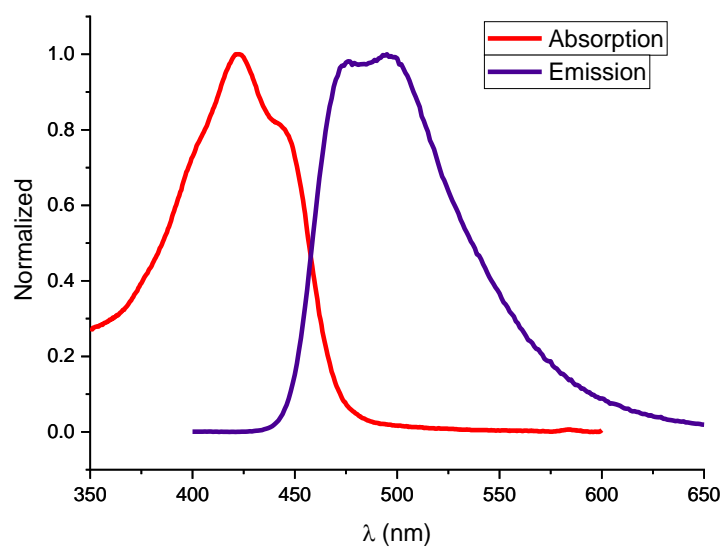

Figure S17. Normalized absorption (red) and emission (dark purple) spectra of curcumin **1**, recorded in THF.

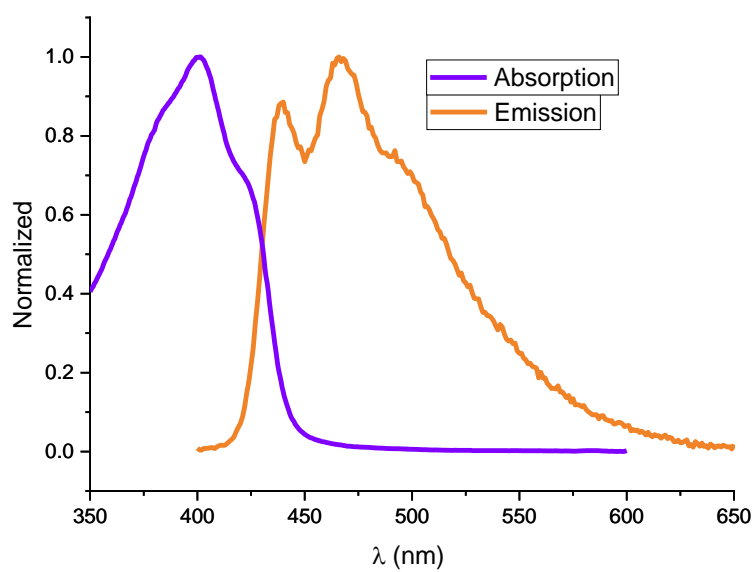

Figure S18. Normalized absorption (purple) and emission (orange) spectra of curcumin derivative **2**, recorded in THF.

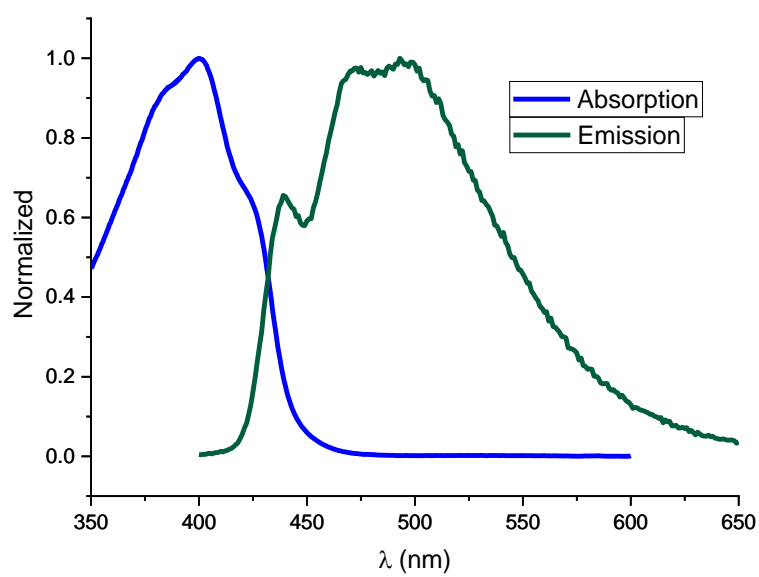

Figure S19. Normalized absorption (blue) and emission (dark green) spectra of curcumin derivative **3**, recorded in THF.

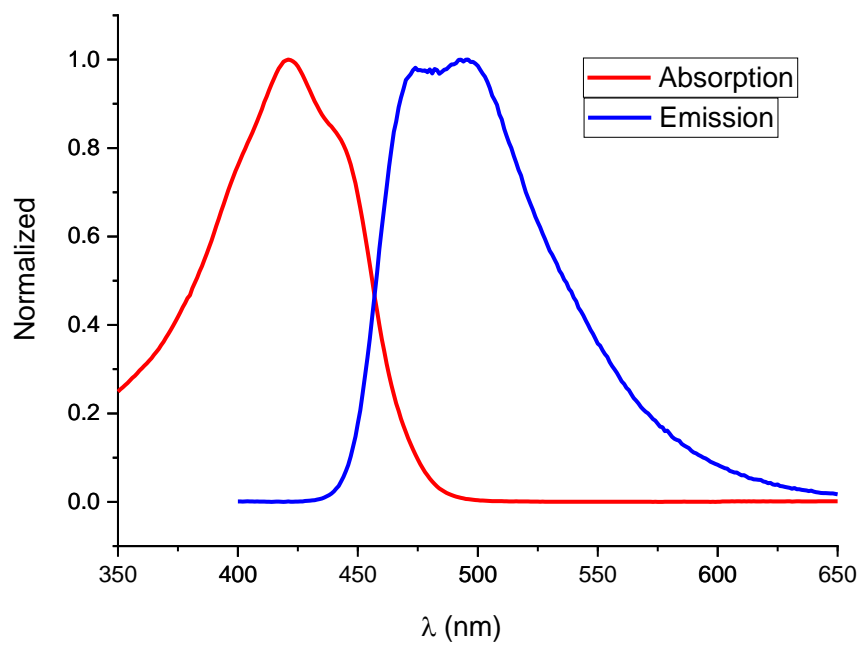

Figure S20. Normalized absorption (red) and emission (blue) spectra of curcumin derivative **4**, recorded in THF.

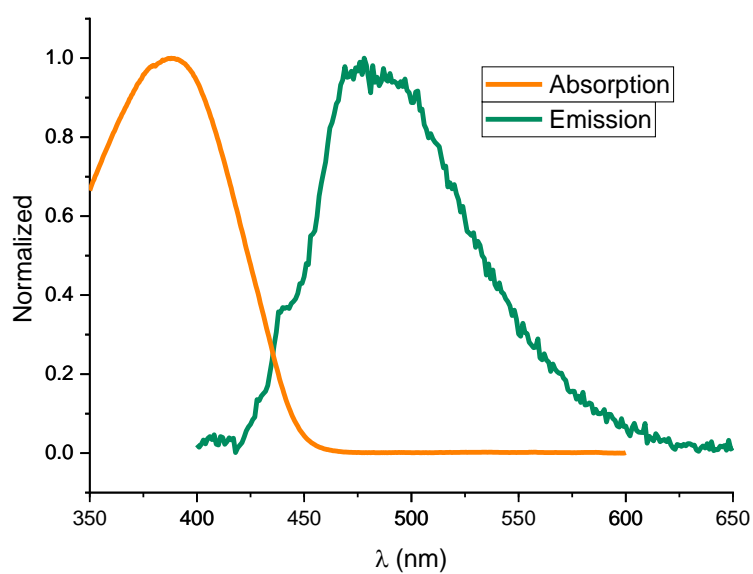

Figure S21. Normalized absorption (orange) and emission (green) spectra of curcumin derivative **5**, recorded in THF.

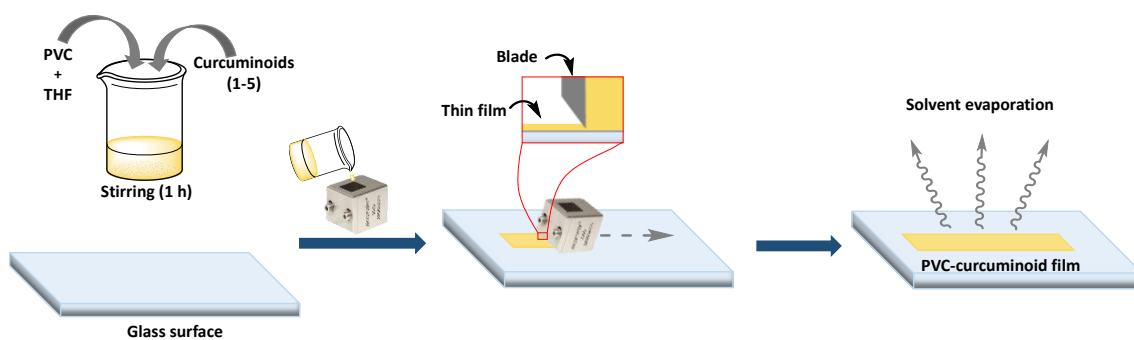

Figure S22. Schematics representing doctor blade type film coating procedure.

### 3. Characterization of PVC-curcumin materials

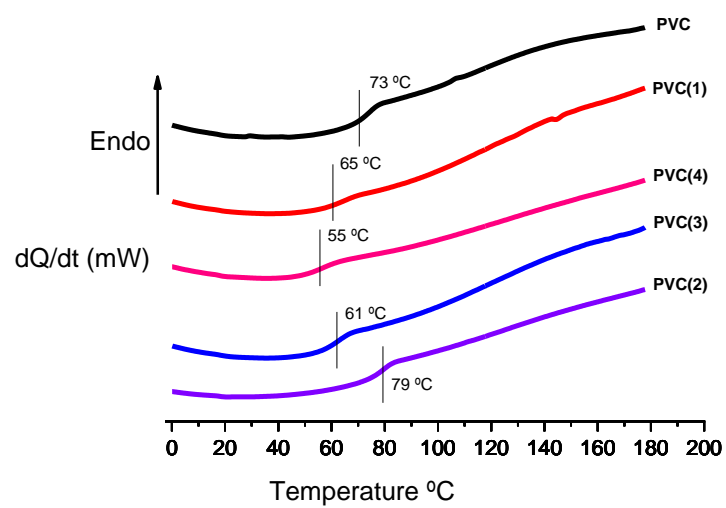

Figure S23. DSC curves for  $T_g$  determination.

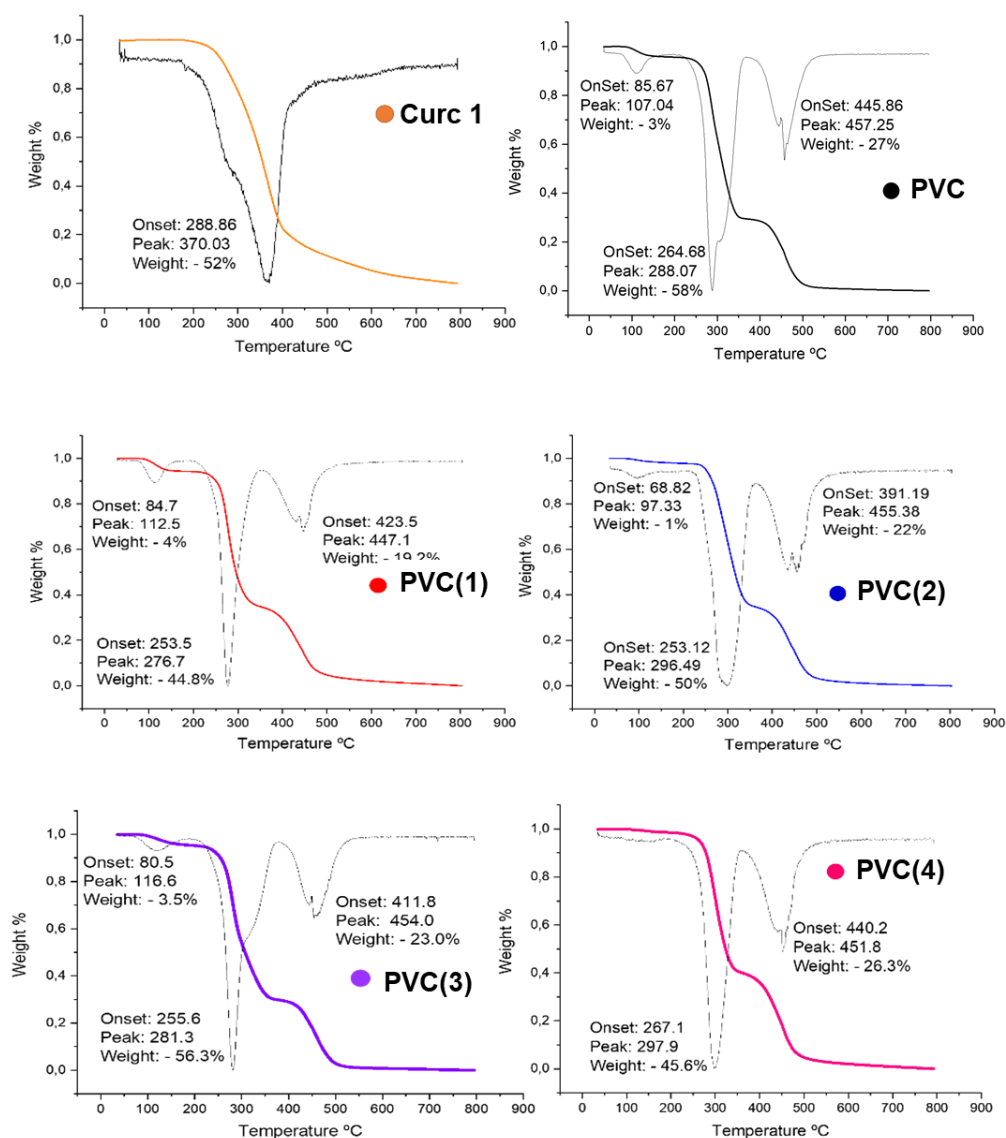

Figure S24. TGA and dTGA spectra of curcumin, PVC and the PVC films doped with 30% (w/w) of curcumin derivatives: 1 - Curcumin (orange); PVC (black); PVC(1)-curc - red; PVC(2)-esterC18 - blue; PVC(3)-esterC10 - purple; PVC(4)-etherC10 – pink.

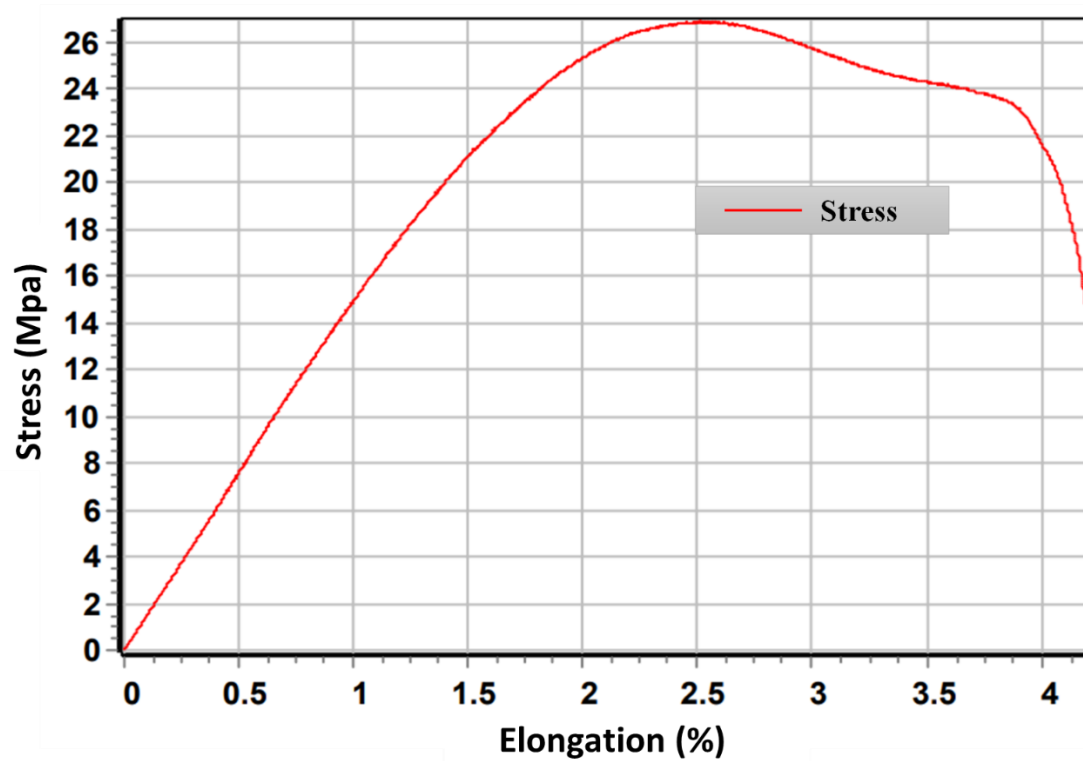

Figure S25. Stress-strain curve for film: PVC.

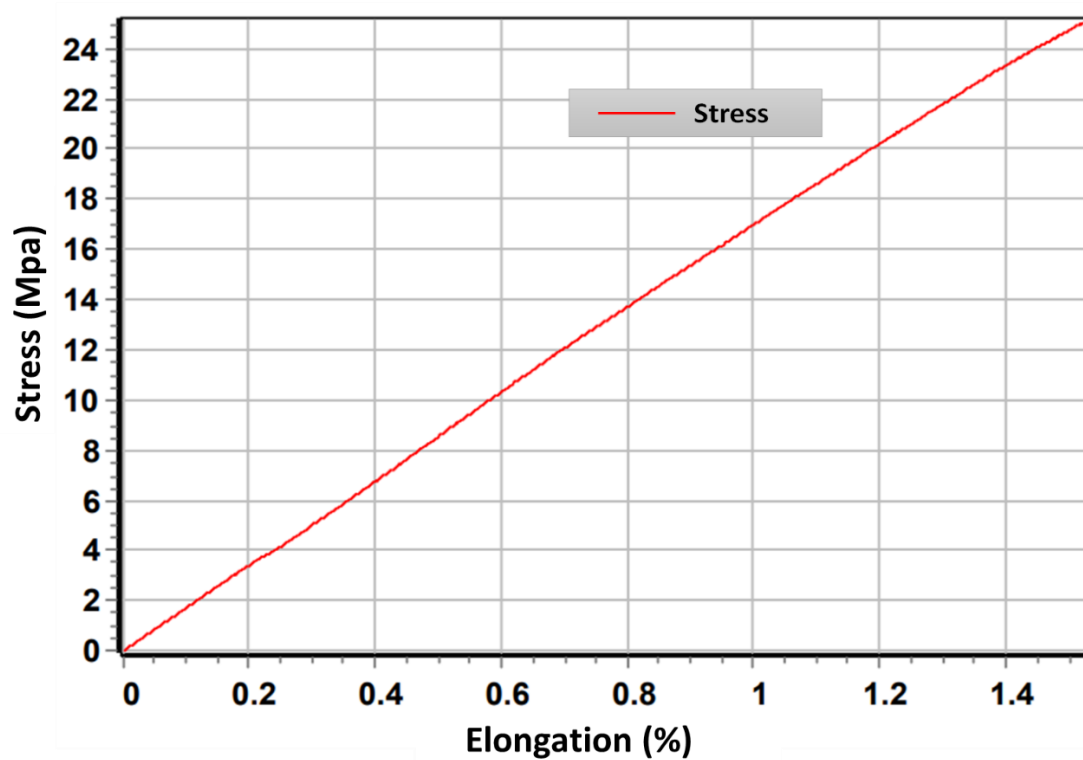

Figure S26. Stress-strain curve for film: PVC(1)-curc.

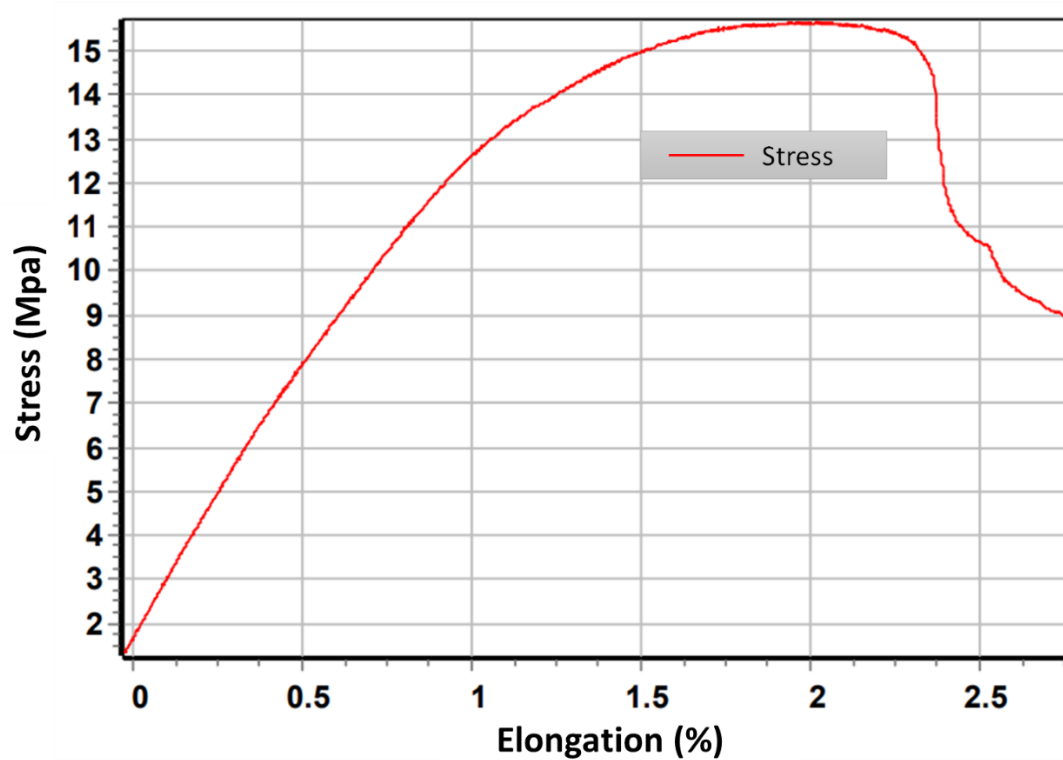

Figure S27. Stress-strain curve for film: PVC(2)-esterC18.

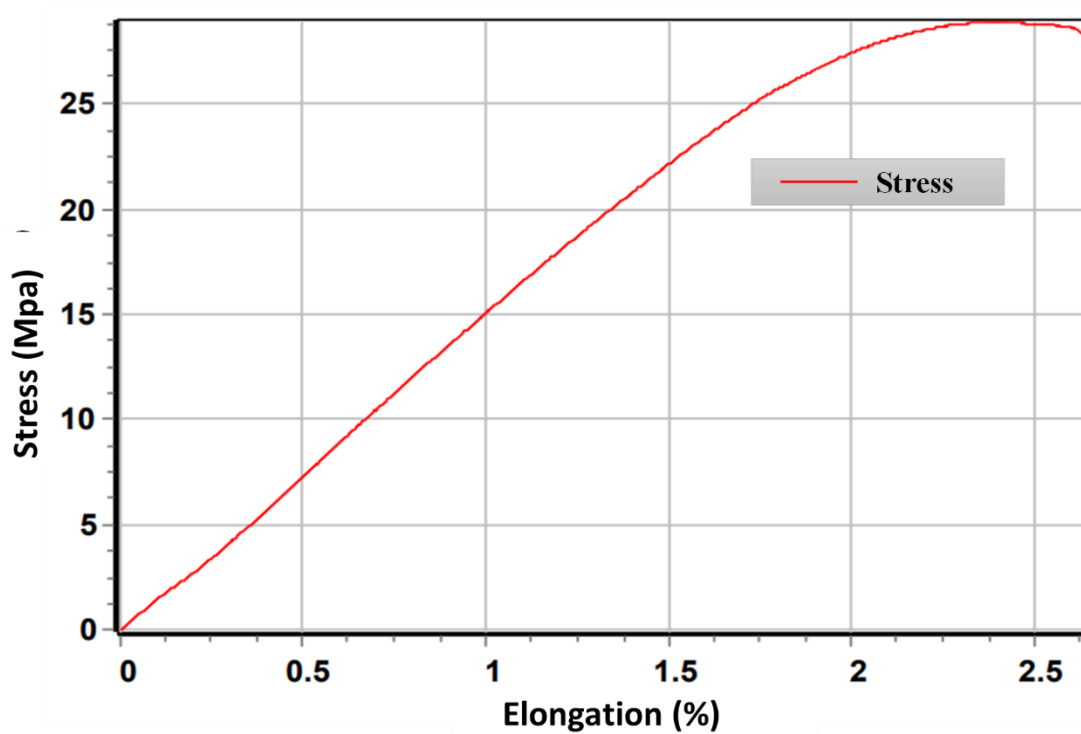

Figure S28. Stress-strain curve for film: PVC(3)-esterC10.



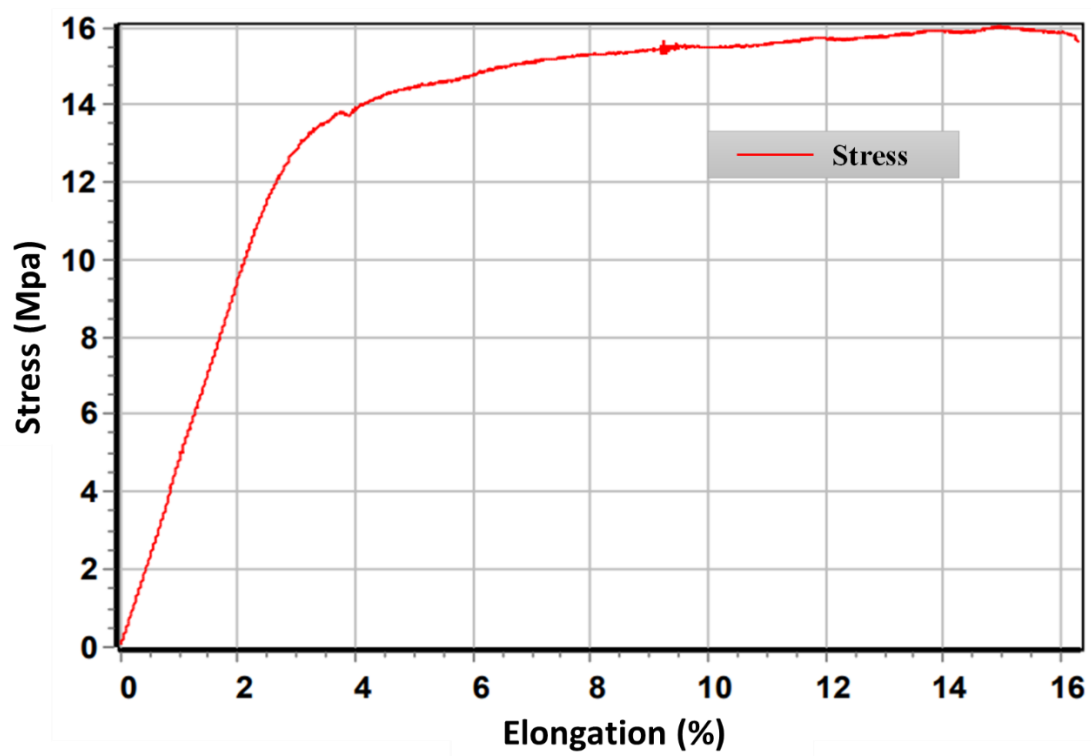

Figure S29. Stress-strain curve for film: PVC(4)-etherC10.
